# Supplementary material for: Enhanced adsorption of oxygen species on c/h-In2O3 Z-scheme heterophase junctions for oxygen-mediated photocatalytic hydrogen production
Source: Royal Society of Chemistry journal article supplement (doi:10.1039/d3cy00537b), 2023-01-01
Supplement: d3cy00537b1.pdf [file d3cy00537b1.pdf]

## Supporting information

# Enhanced Adsorption of Oxygen Species on c/h-In<sub>2</sub>O<sub>3</sub> Z-scheme Heterophase Junctions for Oxygen-mediated Photocatalytic Hydrogen Production

*Zhengxin Peng,<sup>[a]</sup> Xiangbowen Du,<sup>[b]</sup> Nan Lu,<sup>[a,b]</sup> Jing Sui,<sup>[a]</sup> Xiaofan Zhang,<sup>[a]</sup>  
Renhong Li,<sup>[b]</sup> and Xiaoqing Yan<sup>\*[a]</sup>*

[a] Department of Chemistry, School of Science, Zhejiang Sci-Tech University,  
Hangzhou, 310018, PR China.

[b] National Engineering Lab for Textile Fiber Materials and Processing Technology,  
School of Materials Science & Engineering, Zhejiang Sci-Tech University,  
Hangzhou, 310018, PR China.

### **\*Corresponding Authors**

*E-mail: yanxiaoqing927@126.com (X.Q. Yan)*

Table S1. Comparison of the photocatalytic hydrogen evolution activity over different heterophase junction photocatalysts under visible light irradiation.

| Photocatalyst                                | Mass (mg) | Cocatalyst   | Reactants and Concentration                                           | Photocatalytic Activity ( $\mu\text{mol h}^{-1} \text{g}^{-1}$ ) | Ref       |
|----------------------------------------------|-----------|--------------|-----------------------------------------------------------------------|------------------------------------------------------------------|-----------|
| rh/c-In <sub>2</sub> O <sub>3</sub> (MOF)    | 100       | none         | 15 vol% triethanolamine                                               | 2244                                                             | 1         |
| Phase junction TiO <sub>2</sub>              | 10        | none         | 10 vol% CH <sub>3</sub> OH                                            | 80                                                               | 2         |
| orthorhombic/hexagonal WO <sub>3</sub>       | 50        | none         | Na <sub>2</sub> S (0.35 M) + Na <sub>2</sub> SO <sub>3</sub> (0.25 M) | 708                                                              | 3         |
| Anatase/Brookite TiO <sub>2</sub>            | 100       | Pt (1.0 wt%) | 10 vol% CH <sub>3</sub> OH                                            | 3423                                                             | 4         |
| Anatase/Rutile TiO <sub>2</sub>              | 100       | Pt (1.0 wt%) | 10 vol% CH <sub>3</sub> OH                                            | 1453                                                             | 4         |
| tri-/tri-s-tri C <sub>3</sub> N <sub>4</sub> | 50        | Pt (3.0 wt%) | 10 vol% triethanolamine                                               | 2880                                                             | 5         |
| hexagonal/g-C <sub>3</sub> N <sub>4</sub>    | 30        | Pt (10 wt%)  | 20 vol% triethanolamine                                               | 4000                                                             | 6         |
| c/h-In <sub>2</sub> O <sub>3</sub>           | 20        | none         | 3 M HCHO and 5 M NaOH                                                 | 730                                                              | this work |

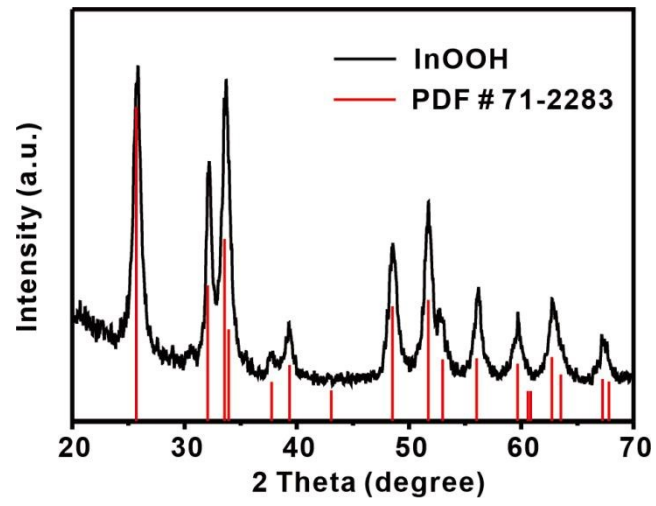

Figure S1. XRD of the InOOH precursor.

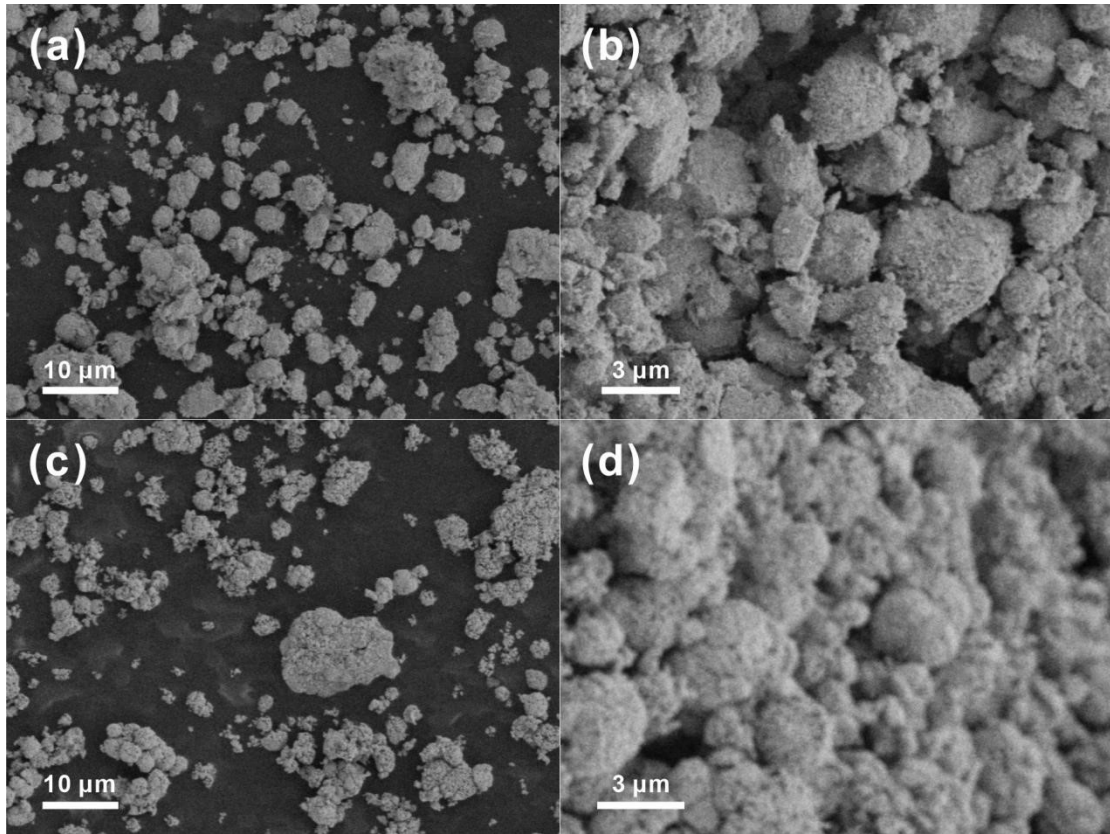

Figure S2. SEM of the (a,b) h-In<sub>2</sub>O<sub>3</sub> and (c,d) c-In<sub>2</sub>O<sub>3</sub>.

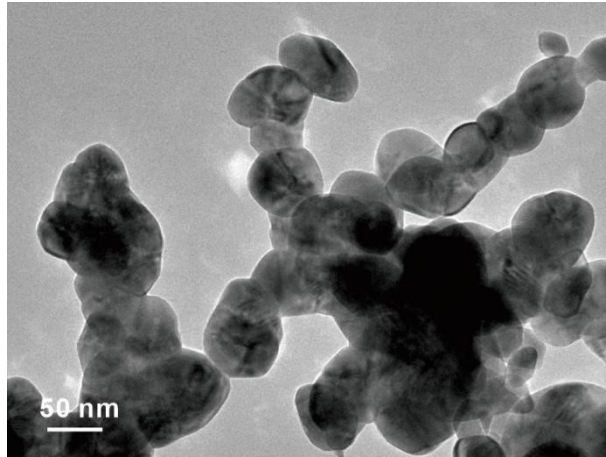

Figure S3. TEM of c/h-In<sub>2</sub>O<sub>3</sub>.

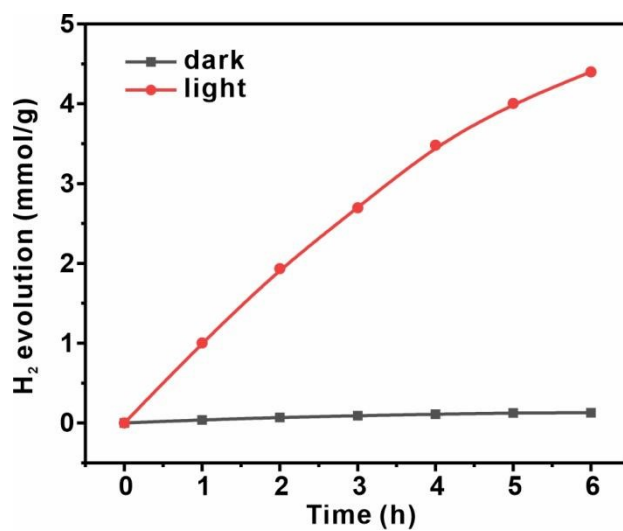

Figure S4. The time profiles of hydrogen production from c/h-In<sub>2</sub>O<sub>3</sub> suspending in an aqueous solution containing 3 M HCHO and 5 M NaOH at 0.21 O<sub>2</sub> atm, under dark and light conditions.

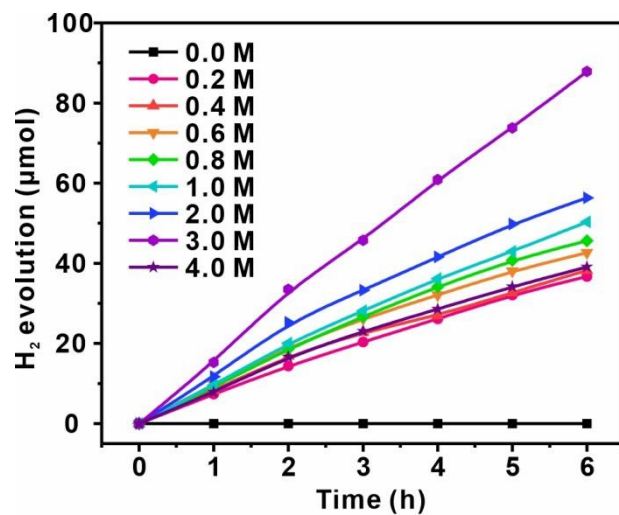

Figure S5. The time profiles of hydrogen production from c/h-In<sub>2</sub>O<sub>3</sub> suspending in an aqueous solution containing 5 M of NaOH and different concentrations of HCHO at 0.21 O<sub>2</sub> atm under visible-light irradiation ( $\lambda > 420$  nm).

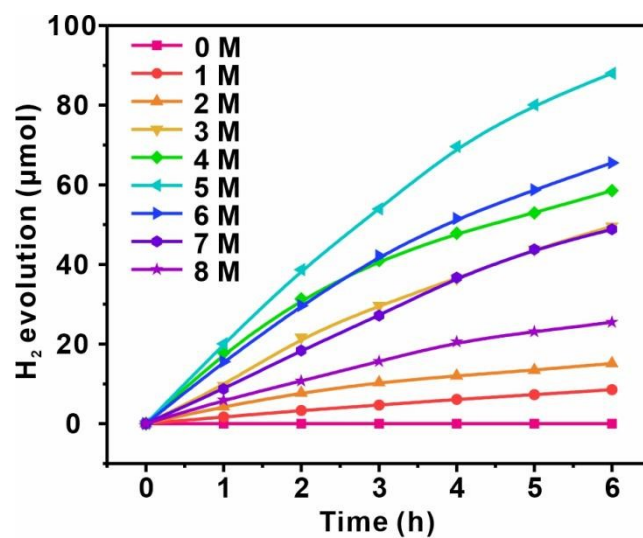

Figure S6. The time profiles of hydrogen production from c/h-In<sub>2</sub>O<sub>3</sub> suspending in an aqueous solution containing 3 M of HCHO and different concentrations of NaOH at 0.21 O<sub>2</sub> atm under visible-light irradiation ( $\lambda > 420$  nm).



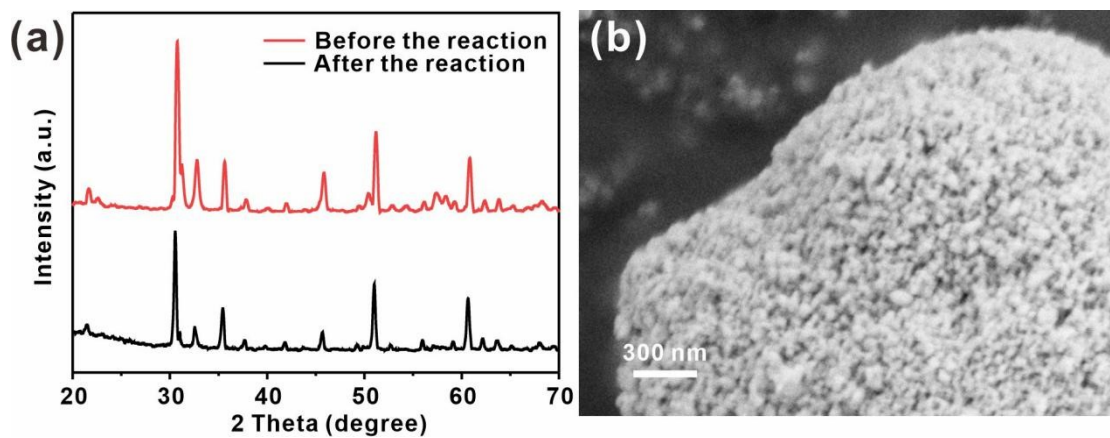

Figure S7. (a) XRD and (b) SEM of c/h-In<sub>2</sub>O<sub>3</sub> sample after 5 cycles of illumination.

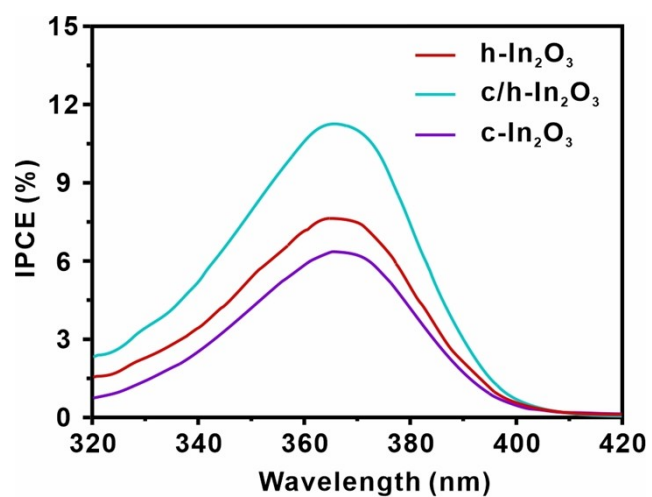

Figure S8. Incident photon to converted electron spectra (IPCE) of h-In<sub>2</sub>O<sub>3</sub>, c/h-In<sub>2</sub>O<sub>3</sub> and c-In<sub>2</sub>O<sub>3</sub>.

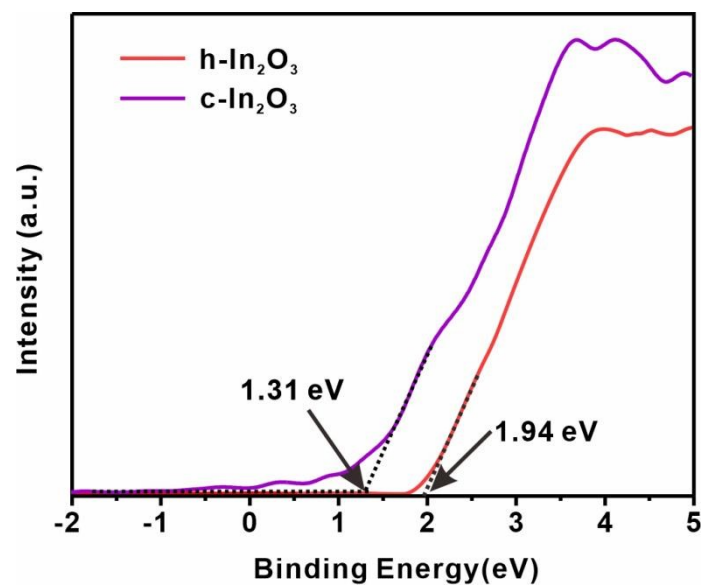

Figure S9. XPS valence band spectra of h-In<sub>2</sub>O<sub>3</sub> and c-In<sub>2</sub>O<sub>3</sub>.

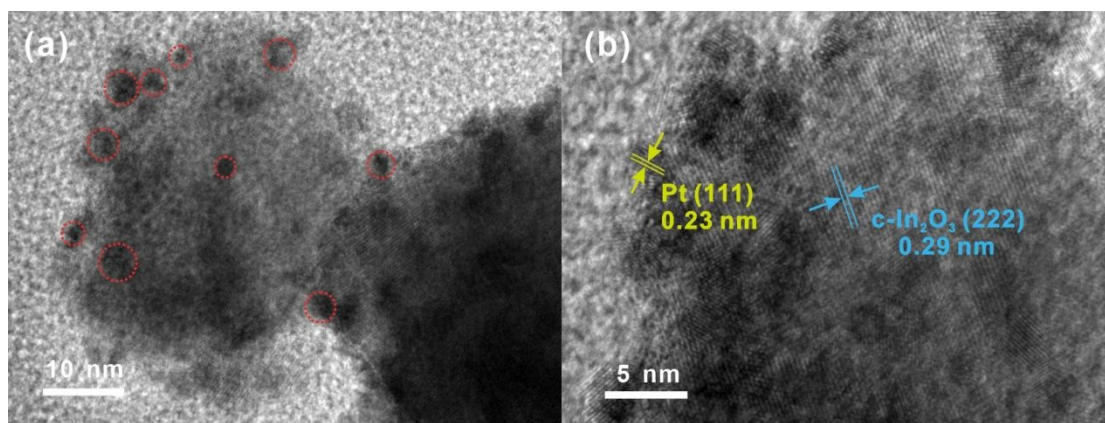

Figure S10. (a) TEM images of c/h-In<sub>2</sub>O<sub>3</sub> after photoreduction deposition of Pt nanoparticles, (b) HRTEM image of c/h-In<sub>2</sub>O<sub>3</sub> after photoreduction deposition of Pt nanoparticles.

## References:

1. L. Han, F. Jing, J. zhang, X. Z. Luo, Y. L. Zhong, K. Wang, S. H. Zang, D. H. Teng, Y. Liu, J. Chen, C. Yang and Y. T. Zhou, *Applied Catalysis B: Environmental*, 2021, **282**, 119602.
2. C. Qiu, J. Lin, J. Shen, D. Liu, Z. Zhang, H. Lin and X. Wang, *Catalysis Science & Technology*, 2020, **10**, 3709-3719.
3. W. Q. Zhao, J. W. Zou, S. Z. Qu, P. L. Qin, X. B. Chen, S. J. Ding, L. Ma and Q. Q. Wang, *ACS Applied Materials & Interfaces*, 2021, **13**, 44440-44450.
4. P. Du, P. Niu, Y. Yang, R. Chen, L. C. Yin, F. Fan and G. Liu, *The Journal of Physical Chemistry Letters*, 2022, **13**, 4244-4250.
5. Z. Zeng, H. Yu, X. Quan, S. Chen and S. Zhang, *Applied Catalysis B: Environmental*, 2018, **227**, 153-160.
6. Y. Li, J. He, X. Wang, J. Zhao, R. Liu, Y. Liu and F. Li, *Applied Surface Science*, 2021, **559**, 149876.
